# Supplementary material
Source: PubMed Central journal article supplement (PMC4567638)
Supplement: IAI.00531-15_zii999091389so2.pdf [file IAI.00531-15_zii999091389so2.pdf]

**Figure S1. Distribution of severe malaria cases.** (A) Percentage of individuals according to the number of affected organs within all severe malaria cases. Other cases refer to patients having severe malaria without the involvement of at least one organ, such as severe anemia, jaundice and metabolic acidosis. (B) Distribution of the type of damaged organ, within the group of patients having only one damaged organ, and (C) having two damaged organs.
