# Supplementary material
Source: PubMed Central journal article supplement (PMC4567638)

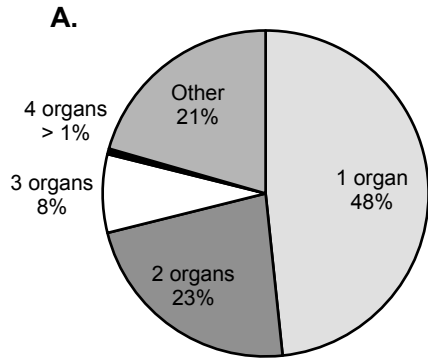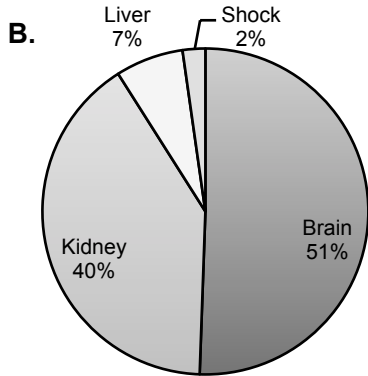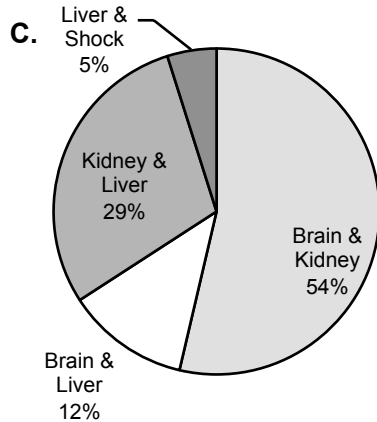

Supplement: IAI.00531-15_zii999091389so1.pdf [file IAI.00531-15_zii999091389so1.pdf]
